# Supplementary material
Source: publisher site journal article supplement (https://www.dovepress.com/get_supplementary_file.php?f=460503.docx)
Supplement: Supplementary file 1 [file get_supplementary_file.php]

Supplementary materials

Example 1: count punctuation in a sentence:

import string

# Sample sentence to analyze

sentence = "example sentence is here."

# Initialize a dictionary to store the punctuation counts

punctuation_counts = {}

# Iterate through each character in the sentence

for char in sentence:

# Check if the character is a punctuation mark

if char in string.punctuation:

# If the punctuation mark is already in the dictionary, increment the count

if char in punctuation_counts:

punctuation_counts[char] += 1

# If the punctuation mark is not in the dictionary, add it and set the count to 1

else:

punctuation_counts[char] = 1

# Print out the final punctuation counts

for punctuation, count in punctuation_counts.items():

print(f"{punctuation}: {count}")

Example 2: total number of words:

# Sample text to analyze

text = " example sentence is here "

# Split the text into individual words

words = text.split()

# Count the number of words

num_words = len(words)

# Print the number of words

print(f"Number of words: {num_words}")

Example 3: the number of words before and after comma in a paragraph using python:

# Sample sentences to analyze

sentences = [

"example sentence is here",

"example sentence 2",

" example sentence 3",

"example sentence 4"

]

for sentence in sentences:

# Split the sentence into individual words

words = sentence.split()

# Find the index of the first comma in the list of words

if ',' in words:

comma_index = words.index(',')

else:

comma_index = -1

# Count the number of words before and after the comma

if comma_index != -1:

num_words_before_comma = comma_index

num_words_after_comma = len(words) - comma_index - 1

else:

num_words_before_comma = 0

num_words_after_comma = 0

# Print the results

print(f"Sentence: {sentence}")

print(f"Number of words before comma: {num_words_before_comma}")

print(f"Number of words after comma: {num_words_after_comma}")

print()

Example 4: average Sentence length:

def calculate_average_sentence_length(text):

sentences = text.split('.') # Split text into sentences based on period

total_words = 0

total_sentences = len(sentences)

for sentence in sentences:

words = sentence.split() # Split each sentence into words

total_words += len(words)

if total_sentences > 0:

average_length = total_words / total_sentences

return average_length

else:

return 0 # Return 0 if there are no sentences in the text

# Example usage

text = " example sentence is here"

average_length = calculate_average_sentence_length(text)

print("Average sentence length:", average_length)

Example 5: average sentence standard deviation:

import math

def calculate_average_sentence_length(text):

sentences = text.split('.') # Split text into sentences based on period (you can customize this based on your needs)

total_words = 0

total_sentences = len(sentences)

sentence_lengths = []

for sentence in sentences:

words = sentence.split() # Split each sentence into words

total_words += len(words)

sentence_lengths.append(len(words))

if total_sentences > 0:

average_length = total_words / total_sentences

variance = sum((length - average_length) ** 2 for length in sentence_lengths) / total_sentences

standard_deviation = math.sqrt(variance)

return standard_deviation

else:

return 0 # Return 0 if there are no sentences in the text

# Example usage

text = " example sentence is here. "

average_std_dev = calculate_average_sentence_length(text)

print("Average sentence standard deviation:", average_std_dev)

Example 6: adjectives in the Sentence

import nltk

def count_adjectives(sentence):

# Tokenize the sentence into individual words

words = nltk.word_tokenize(sentence)

# Tag each word with its part-of-speech (POS) using NLTK's POS tagger

tagged_words = nltk.pos_tag(words)

# Count the number of adjectives in the tagged words

adjective_count = sum(1 for word, pos in tagged_words if pos.startswith('JJ'))

return adjective_count

# Example usage

sentence = " example sentence is here "

adjective_count = count_adjectives(sentence)

print("Number of adjectives:", adjective_count)

Example 7: Average number of letters per word:

def calculate_average_letters(paragraph):

words = paragraph.split() # Split the paragraph into individual words

total_letters = sum(len(word) for word in words) # Calculate the total number of letters

word_count = len(words) # Count the number of words

average_letters = total_letters / word_count # Calculate the average number of letters

return average_letters

# Example usage

paragraph = " example sentence is here "

average_letters = calculate_average_letters(paragraph)

print("Average number of letters per word:", average_letters)

Example 8: standard deviation of the number of letters:

import statistics

def calculate_standard_deviation(paragraph):

words = paragraph.split() # Split the paragraph into individual words

letter_counts = [len(word) for word in words] # Calculate the number of letters in each word

# Calculate the standard deviation using the statistics module

standard_deviation = statistics.stdev(letter_counts)

return standard_deviation

# Example usage

paragraph = " example sentence is here "

std_deviation = calculate_standard_deviation(paragraph)

print("Standard deviation of the number of letters:", std_deviation)

#Counting Location

import spacy

def extract_location_sentences(text):

nlp = spacy.load("en_core_web_sm") # Load the English language model

doc = nlp(text) # Process the text with spaCy

location_sentences = []

for sentence in doc.sents:

for entity in sentence.ents:

if entity.label_ == "GPE": # Check if the entity is classified as a geopolitical entity (location)

location_sentences.append(sentence.text)

break

return location_sentences

# Example usage

text = " example sentence is here"

location_sentences = extract_location_sentences(text)

print("Location sentences:")

for sentence in location_sentences:

print("-", sentence)

Example 9: sentiment analysis:

from textblob import TextBlob

def calculate_sentiment_analysis(text):

blob = TextBlob(text)

sentiment = blob.sentiment.polarity

if sentiment > 0:

return "Positive sentiment"

elif sentiment < 0:

return "Negative sentiment"

else:

return "Neutral sentiment"

# Example usage

paragraph = " example sentence is here"

sentiment = calculate_sentiment_analysis(paragraph)

print(sentiment)

Example 10: counting tenses:

import nltk

from nltk.tokenize import word_tokenize

from nltk.tag import pos_tag

def count_tenses(paragraph):

# Tokenize the paragraph into words

words = word_tokenize(paragraph)

# Perform part-of-speech tagging

tagged_words = pos_tag(words)

# Initialize tense count variables

past_count = 0

present_count = 0

future_count = 0

# Count the occurrences of different tenses

for word, tag in tagged_words:

if tag.startswith('VBD'): # Past tense

past_count += 1

elif tag.startswith('VBP') or tag.startswith('VBZ'): # Present tense

present_count += 1

elif tag.startswith('MD'): # Modal verbs indicating future tense

future_count += 1

# Return the tense counts

return past_count, present_count, future_count

# Example usage

paragraph = " example sentence is here"

past, present, future = count_tenses(paragraph)

print("Past tense count:", past)

print("Present tense count:", present)

print("Future tense count:", future)
